# Supplementary material
Source: MDPI journal article supplement (https://www.mdpi.com/2073-4441/12/5/1502)
Supplement: s1 [file s1]

**Table S1.** Attributes of glaciers in the 2018 inventory, based on the Sentinel 2A image and 30-m SRTM digital elevation model.

| **ID** | **Area** | **Shape_Leng** | **xcentroid** | **ycentroid** | **Aspect_**  **Azimuth** | **Aspect_Direction** | **Compass** | **Median Elev.** | **Min Elev.** | **Max Elev.** | **Mean Slope** | **Elev. Range** | **HI** |
| --- | --- | --- | --- | --- | --- | --- | --- | --- | --- | --- | --- | --- | --- |
| 1 | 0.2984 | 3388.77 | 726633.5654 | 4876829.1420 | 56.6 | 45 | NE | 3924 | 3763 | 4176 | 22.6 | 413 | 0.43 |
| 2 | 0.3017 | 2573.21 | 726519.6924 | 4876090.8020 | 82.7 | 90 | E | 4007 | 3840 | 4085 | 18.3 | 245 | 0.63 |
| 3 | 0.0418 | 1505.10 | 725721.5808 | 4876143.1140 | 119.2 | 135 | SE | 3943 | 3862 | 4008 | 17.9 | 146 | 0.55 |
| 4 | 0.1397 | 1866.19 | 726145.6366 | 4873661.1000 | 16.3 | 0 | N | 3971 | 3649 | 4156 | 36.6 | 507 | 0.63 |
| 5 | 0.0498 | 1088.11 | 733998.3744 | 4873845.6300 | 335.3 | 315 | NW | 3902 | 3760 | 3998 | 32.4 | 238 | 0.55 |
| 6 | 0.2801 | 3008.75 | 729637.5523 | 4873494.4480 | 350.2 | 0 | N | 3920 | 3599 | 4157 | 35.7 | 558 | 0.56 |
| 7 | 0.3945 | 2606.93 | 733374.5968 | 4873313.9130 | 5.7 | 0 | N | 3824 | 3650 | 4024 | 26.4 | 374 | 0.48 |
| 8 | 0.1009 | 1382.25 | 732836.6576 | 4873004.2670 | 325 | 315 | NW | 3944 | 3821 | 4018 | 29.9 | 197 | 0.60 |
| 9 | 0.0409 | 1424.68 | 726123.4200 | 4872982.3120 | 107.2 | 90 | E | 3957 | 3907 | 4075 | 21.4 | 168 | 0.44 |
| 10 | 0.0794 | 1397.82 | 729148.9514 | 4872671.4940 | 324.5 | 315 | NW | 3962 | 3739 | 4060 | 31 | 321 | 0.65 |
| 11 | 0.0923 | 1904.09 | 728936.5650 | 4872543.0750 | 332.4 | 315 | NW | 3956 | 3670 | 4092 | 32 | 422 | 0.64 |
| 12 | 0.1443 | 2298.65 | 732305.1198 | 4872486.5250 | 335.6 | 315 | NW | 4016 | 3630 | 4159 | 36.3 | 529 | 0.68 |
| 13 | 1.7789 | 8283.24 | 730737.2631 | 4871241.7900 | 5.8 | 0 | N | 3655 | 3521 | 3968 | 10 | 447 | 0.31 |
| 14 | 0.0211 | 719.41 | 732025.6136 | 4872242.6370 | 312.6 | 315 | NW | 3981 | 3888 | 4091 | 40 | 203 | 0.49 |
| 15 | 0.0264 | 699.41 | 729303.9595 | 4871988.7070 | 63 | 45 | NE | 3899 | 3864 | 3958 | 22.9 | 94 | 0.40 |
| 16 | 17.7647 | 70210.66 | 716307.0866 | 4869106.0040 | 186.9 | 180 | S | 3699 | 3121 | 4367 | 10.1 | 1246 | 0.46 |
| 17 | 0.0329 | 869.12 | 728581.2659 | 4871713.4470 | 21.4 | 0 | N | 3864 | 3832 | 3886 | 16.8 | 54 | 0.58 |
| 18 | 0.4198 | 3146.35 | 729689.1599 | 4871407.1680 | 45.1 | 45 | NE | 3799 | 3686 | 4124 | 22.7 | 438 | 0.34 |
| 19 | 0.0220 | 763.26 | 730318.7946 | 4871590.6510 | 55.9 | 45 | NE | 3636 | 3601 | 3652 | 10.8 | 51 | 0.63 |
| 20 | 2.8340 | 11769.40 | 732822.7366 | 4870650.0990 | 65.4 | 45 | NE | 3759 | 3506 | 4127 | 13.7 | 621 | 0.41 |
| 21 | 0.2105 | 2152.38 | 727780.0936 | 4871050.3980 | 9.5 | 0 | N | 3806 | 3607 | 4066 | 32.5 | 459 | 0.44 |
| 22 | 0.5716 | 3606.17 | 729087.5555 | 4870903.6840 | 316.5 | 315 | NW | 4016 | 3797 | 4232 | 18.8 | 435 | 0.50 |
| 23 | 0.0863 | 2474.80 | 727443.9372 | 4870811.2490 | 327.9 | 315 | NW | 3961 | 3656 | 4157 | 42.7 | 501 | 0.57 |
| 24 | 1.2186 | 8975.78 | 733758.8427 | 4869279.6550 | 64.6 | 45 | NE | 3733 | 3493 | 4055 | 17.8 | 562 | 0.43 |
| 25 | 0.0209 | 949.12 | 721446.1711 | 4881790.0920 | 349.5 | 0 | N | 3842 | 3778 | 3968 | 32.6 | 190 | 0.42 |
| 26 | 0.0204 | 574.56 | 721260.2826 | 4881765.5000 | 20.7 | 0 | N | 3921 | 3840 | 3989 | 39.4 | 149 | 0.55 |
| 27 | 13.7599 | 47481.51 | 722353.8331 | 4872573.1980 | 41.6 | 45 | NE | 3873 | 3309 | 4311 | 9.6 | 1002 | 0.55 |
| 28 | 0.1561 | 1865.77 | 716070.6539 | 4881488.5280 | 35.4 | 45 | NE | 4054 | 3825 | 4236 | 36.7 | 411 | 0.56 |
| 29 | 0.0965 | 1280.83 | 724017.7156 | 4880927.1780 | 27.1 | 45 | NE | 3941 | 3791 | 4082 | 32.5 | 291 | 0.55 |
| 30 | 1.0624 | 7623.23 | 722786.8513 | 4880565.6330 | 359.4 | 0 | N | 3949 | 3484 | 4300 | 36 | 816 | 0.55 |
| 31 | 0.4307 | 3340.90 | 729620.0611 | 4880282.0930 | 347.7 | 0 | N | 3935 | 3563 | 4185 | 35.4 | 622 | 0.60 |
| 32 | 0.9721 | 6075.53 | 728454.4230 | 4879754.7070 | 355.7 | 0 | N | 3978 | 3494 | 4307 | 35 | 813 | 0.57 |
| 33 | 1.4399 | 15250.62 | 723541.5846 | 4879173.1310 | 15.7 | 0 | N | 4001 | 3645 | 4572 | 33.6 | 927 | 0.40 |
| 34 | 1.4944 | 8714.72 | 721220.2907 | 4878468.3350 | 345.3 | 0 | N | 4168 | 3439 | 4517 | 25.2 | 1078 | 0.63 |
| 35 | 0.0442 | 1069.12 | 717468.7297 | 4879525.9150 | 23.1 | 45 | NE | 3909 | 3721 | 4067 | 40.4 | 346 | 0.51 |
| 36 | 1.2154 | 6178.40 | 729801.8300 | 4878089.7030 | 13.9 | 0 | N | 3829 | 3507 | 4261 | 29.5 | 754 | 0.46 |
| 37 | 0.5916 | 4086.08 | 728695.3200 | 4878339.9020 | 40.7 | 45 | NE | 4022 | 3747 | 4326 | 24.6 | 579 | 0.50 |
| 38 | 0.1171 | 2274.88 | 731255.9474 | 4877882.3480 | 10.9 | 0 | N | 3803 | 3610 | 3931 | 26.5 | 321 | 0.56 |
| 39 | 0.0619 | 1043.72 | 726639.9853 | 4877462.7770 | 348 | 0 | N | 3981 | 3867 | 4074 | 36.7 | 207 | 0.56 |
| 40 | 0.3098 | 3353.62 | 727587.6107 | 4877504.0560 | 330.5 | 315 | NW | 3876 | 3713 | 4227 | 30.2 | 514 | 0.38 |
| 41 | 0.8939 | 10002.59 | 723952.4498 | 4877072.3970 | 18.9 | 0 | N | 3823 | 3609 | 4381 | 28.8 | 772 | 0.39 |
| 42 | 0.0416 | 1120.83 | 726099.0493 | 4877557.9300 | 331.2 | 315 | NW | 3759 | 3592 | 4064 | 49.8 | 472 | 0.46 |
| 43 | 0.0373 | 1042.25 | 726853.7629 | 4877593.9060 | 6.2 | 0 | N | 3813 | 3692 | 3955 | 48.5 | 263 | 0.50 |
| 44 | 0.8130 | 6431.23 | 717040.5561 | 4877338.0810 | 47.4 | 45 | NE | 3804 | 3619 | 4159 | 20.1 | 540 | 0.37 |
| 45 | 0.0748 | 2380.66 | 725645.3573 | 4877196.9980 | 335.5 | 315 | NW | 3939 | 3732 | 4081 | 43.3 | 349 | 0.59 |
| 46 | 0.1674 | 3517.06 | 718850.0259 | 4875055.4100 | 15.5 | 0 | N | 3873 | 3615 | 4311 | 36.9 | 696 | 0.46 |
| 47 | 0.1806 | 2580.62 | 721111.1161 | 4874970.1790 | 314.4 | 315 | NW | 4062 | 3759 | 4288 | 37.7 | 529 | 0.55 |
| 48 | 0.0471 | 1361.25 | 719051.3275 | 4874612.6120 | 82.7 | 90 | E | 4043 | 3833 | 4188 | 48.9 | 355 | 0.55 |
| 49 | 0.0983 | 1683.53 | 721001.0814 | 4874340.4780 | 292.4 | 270 | WE | 4083 | 3779 | 4226 | 37.1 | 447 | 0.61 |
| 50 | 0.0447 | 1087.98 | 721032.0508 | 4873958.5900 | 300.1 | 315 | NW | 4112 | 3969 | 4199 | 37.3 | 230 | 0.59 |
| 51 | 0.8803 | 6239.43 | 708119.6866 | 4884252.2190 | 40.5 | 45 | NE | 3845 | 3433 | 4443 | 23 | 1010 | 0.44 |
| 52 | 0.0247 | 1039.83 | 708753.8040 | 4883312.5690 | 38 | 45 | NE | 3599 | 3549 | 3782 | 34.6 | 233 | 0.30 |
| 53 | 0.0594 | 1455.39 | 708622.1693 | 4883043.1280 | 26.2 | 45 | NE | 3969 | 3716 | 4072 | 47.1 | 356 | 0.65 |
| 54 | 1.4132 | 13174.03 | 715511.3340 | 4879775.2020 | 328.6 | 315 | NW | 4102 | 3364 | 4578 | 28 | 1214 | 0.60 |
| 55 | 0.1506 | 2492.34 | 708020.3804 | 4880937.3390 | 10.6 | 0 | N | 3983 | 3594 | 4139 | 43 | 545 | 0.64 |
| 56 | 0.0290 | 849.12 | 707757.2856 | 4881048.8400 | 22.2 | 0 | N | 3833 | 3765 | 4019 | 47.5 | 254 | 0.36 |
| 57 | 0.3300 | 4298.41 | 708518.8371 | 4880095.6820 | 26 | 45 | NE | 3810 | 3578 | 4056 | 26.3 | 478 | 0.51 |
| 58 | 0.1402 | 2934.21 | 708145.6008 | 4879051.3000 | 56.3 | 45 | NE | 3702 | 3614 | 3873 | 24.7 | 259 | 0.38 |
| 59 | 0.2492 | 2173.80 | 707251.4056 | 4878660.6880 | 37 | 45 | NE | 3745 | 3672 | 3805 | 13.1 | 133 | 0.53 |
| 60 | 0.0395 | 1053.97 | 706365.6097 | 4878707.5300 | 93 | 90 | E | 3836 | 3783 | 3910 | 23.8 | 127 | 0.40 |
| 61 | 0.5358 | 4705.51 | 706456.2532 | 4877963.4230 | 38.3 | 45 | NE | 3764 | 3510 | 4128 | 25 | 618 | 0.46 |
| 62 | 0.0270 | 854.97 | 706617.0949 | 4877391.3340 | 50 | 45 | NE | 3937 | 3820 | 3965 | 32.8 | 145 | 0.73 |
| 63 | 0.0818 | 1409.53 | 708989.1330 | 4875764.5090 | 43.2 | 45 | NE | 3730 | 3623 | 3801 | 22.2 | 178 | 0.54 |
| 64 | 0.6690 | 4891.70 | 708085.7772 | 4874746.3210 | 56.7 | 45 | NE | 3677 | 3463 | 3885 | 16.7 | 422 | 0.50 |
| 65 | 0.0854 | 1500.24 | 711381.6159 | 4874642.0600 | 23.4 | 45 | NE | 3907 | 3735 | 4076 | 39.1 | 341 | 0.51 |
| 66 | 0.0550 | 1518.82 | 713848.7530 | 4874542.8710 | 337.3 | 315 | NW | 3848 | 3731 | 3947 | 36.1 | 216 | 0.52 |
| 67 | 0.2033 | 2390.37 | 711663.8161 | 4874107.6090 | 43.5 | 45 | NE | 3864 | 3604 | 4073 | 33.7 | 469 | 0.54 |
| 68 | 0.0486 | 1134.97 | 709572.6099 | 4873534.5970 | 23.7 | 45 | NE | 3769 | 3636 | 3874 | 34 | 238 | 0.56 |
| 69 | 0.0234 | 1252.96 | 711541.9111 | 4873390.4690 | 76.4 | 90 | E | 3963 | 3739 | 4111 | 39.3 | 372 | 0.57 |
| 70 | 0.0931 | 1657.44 | 708116.3169 | 4887300.5000 | 346.1 | 0 | N | 3961 | 3772 | 4070 | 34.6 | 298 | 0.61 |
| 71 | 0.2548 | 3196.63 | 707235.6926 | 4885309.4470 | 313.8 | 315 | NW | 4028 | 3602 | 4231 | 36.4 | 629 | 0.65 |
| 72 | 0.1654 | 2965.07 | 707072.2930 | 4884594.0180 | 302.5 | 315 | NW | 4028 | 3773 | 4206 | 36.5 | 433 | 0.57 |
| 73 | 0.4159 | 6057.68 | 707285.9943 | 4882942.8460 | 301.6 | 315 | NW | 4100 | 3716 | 4468 | 36.4 | 752 | 0.50 |
| 74 | 0.1080 | 2400.94 | 707002.7645 | 4882483.2150 | 303.6 | 315 | NW | 4075 | 3849 | 4337 | 41.2 | 488 | 0.50 |
| 75 | 1.9739 | 14489.83 | 706910.3448 | 4879984.4270 | 352.4 | 0 | N | 3722 | 3456 | 4106 | 16.8 | 650 | 0.43 |
| 76 | 0.1326 | 2084.51 | 705383.8526 | 4880520.5780 | 34.9 | 45 | NE | 3817 | 3558 | 4082 | 37.4 | 524 | 0.49 |
| 77 | 0.0406 | 1110.54 | 704751.1550 | 4880390.3840 | 313.6 | 315 | NW | 3890 | 3661 | 4007 | 50.2 | 346 | 0.65 |
| 78 | 0.0676 | 1408.69 | 705879.2424 | 4878361.6850 | 308.5 | 315 | NW | 3909 | 3780 | 4001 | 35.8 | 221 | 0.58 |
| 79 | 1.2476 | 7450.73 | 705752.2023 | 4876687.6680 | 336.4 | 315 | NW | 3675 | 3332 | 3937 | 17 | 605 | 0.56 |
| 80 | 0.3867 | 4363.57 | 703894.0436 | 4876269.6200 | 335.6 | 315 | NW | 3607 | 3434 | 3855 | 24.6 | 421 | 0.44 |
| 81 | 0.1403 | 2645.93 | 705763.2624 | 4873737.8650 | 253.2 | 270 | WE | 3521 | 3455 | 3670 | 18.1 | 215 | 0.37 |
| 82 | 5.4893 | 25486.25 | 707745.3035 | 4871769.8500 | 314.7 | 315 | NW | 3587 | 3252 | 3971 | 11.5 | 719 | 0.50 |
| 83 | 0.2419 | 3591.20 | 703430.8163 | 4872940.0600 | 28.1 | 45 | NE | 3360 | 3315 | 3567 | 13.5 | 252 | 0.30 |
| 84 | 0.1475 | 2462.73 | 703083.5599 | 4871869.2670 | 349.9 | 0 | N | 3327 | 3273 | 3371 | 11.3 | 98 | 0.57 |
| 85 | 2.9663 | 13399.06 | 708613.6565 | 4868429.8800 | 346 | 0 | N | 3556 | 3311 | 3952 | 13.1 | 641 | 0.40 |
| 86 | 0.0263 | 1083.26 | 709092.2302 | 4869407.0140 | 286.5 | 270 | WE | 3676 | 3552 | 3716 | 22.1 | 164 | 0.68 |
| 87 | 0.5390 | 3722.33 | 707605.8173 | 4868719.9270 | 341.8 | 0 | N | 3562 | 3432 | 3813 | 19 | 381 | 0.41 |
| 88 | 0.5467 | 7005.90 | 706909.5392 | 4868178.7780 | 347.3 | 0 | N | 3517 | 3328 | 3928 | 22.3 | 600 | 0.36 |
| 89 | 0.0998 | 1904.63 | 706371.4615 | 4867843.3560 | 317.4 | 315 | NW | 3674 | 3498 | 3872 | 36.1 | 374 | 0.47 |
| 90 | 0.0245 | 817.40 | 706015.0920 | 4867694.7610 | 329.3 | 315 | NW | 3515 | 3424 | 3671 | 48.9 | 247 | 0.42 |
| 91 | 0.0977 | 1928.53 | 705241.7938 | 4867296.2160 | 349.2 | 0 | N | 3384 | 3331 | 3429 | 9.6 | 98 | 0.50 |
| 92 | 2.1174 | 14107.99 | 708116.9754 | 4866552.8040 | 275.7 | 270 | WE | 3639 | 3271 | 3854 | 15.3 | 583 | 0.58 |
| 93 | 0.0807 | 1775.81 | 707951.9017 | 4867213.5450 | 255.2 | 270 | WE | 3702 | 3493 | 3849 | 27.8 | 356 | 0.53 |
| 94 | 0.1197 | 2490.98 | 707703.6634 | 4865281.9670 | 312.2 | 315 | NW | 3588 | 3447 | 3725 | 22.2 | 278 | 0.50 |
| 95 | 0.3527 | 3369.13 | 707094.6303 | 4864886.7080 | 353.1 | 0 | N | 3472 | 3362 | 3709 | 14.8 | 347 | 0.34 |
| 96 | 0.0203 | 886.69 | 707505.0556 | 4864674.9200 | 312.7 | 315 | NW | 3646 | 3539 | 3692 | 30.2 | 153 | 0.62 |
| 97 | 0.3196 | 3816.61 | 706381.2105 | 4863969.1810 | 341.8 | 0 | N | 3486 | 3377 | 3670 | 18.4 | 293 | 0.41 |
| 98 | 0.4475 | 4050.07 | 705546.5407 | 4863613.1830 | 345.2 | 0 | N | 3488 | 3388 | 3704 | 16.2 | 316 | 0.36 |
| 99 | 0.9962 | 7174.45 | 730482.0414 | 4869346.5290 | 65 | 45 | NE | 3603 | 3473 | 3994 | 14.8 | 521 | 0.28 |
| 100 | 0.0559 | 1223.26 | 732286.4152 | 4869214.0680 | 262.2 | 270 | WE | 3684 | 3592 | 3732 | 16.8 | 140 | 0.60 |
| 101 | 0.1782 | 2933.57 | 732687.0881 | 4868400.5610 | 320.7 | 315 | NW | 3654 | 3538 | 3841 | 22.3 | 303 | 0.42 |
| 102 | 1.3328 | 9136.78 | 726016.4085 | 4867833.0850 | 258.4 | 270 | WE | 3819 | 3614 | 4043 | 12.9 | 429 | 0.46 |
| 103 | 0.0245 | 648.70 | 733332.1387 | 4868497.9460 | 281.8 | 270 | WE | 3909 | 3836 | 3979 | 29.8 | 143 | 0.48 |
| 104 | 0.6467 | 5496.30 | 729463.5501 | 4867802.7370 | 282.3 | 270 | WE | 3744 | 3640 | 4047 | 13.7 | 407 | 0.37 |
| 105 | 0.0305 | 780.83 | 730097.3700 | 4868101.0620 | 60.9 | 45 | NE | 3574 | 3547 | 3607 | 15.4 | 60 | 0.48 |
| 106 | 0.0492 | 1194.97 | 730601.7437 | 4867679.1690 | 32.9 | 45 | NE | 3462 | 3425 | 3641 | 35.8 | 216 | 0.30 |
| 107 | 0.3870 | 2989.78 | 726598.8126 | 4866499.1440 | 300.6 | 315 | NW | 3755 | 3646 | 3977 | 19.4 | 331 | 0.40 |
| 108 | 0.6138 | 5774.70 | 727774.3954 | 4865791.8170 | 93.1 | 90 | E | 3593 | 3485 | 3816 | 13.8 | 331 | 0.35 |
| 109 | 0.2098 | 2143.09 | 726705.1966 | 4865411.2210 | 290 | 270 | WE | 3718 | 3648 | 3798 | 12.9 | 150 | 0.46 |
| 110 | 0.1371 | 2912.67 | 723519.1851 | 4865355.5780 | 53.9 | 45 | NE | 3711 | 3390 | 3930 | 31 | 540 | 0.59 |
| 111 | 1.3829 | 10291.02 | 728873.3805 | 4864466.2490 | 8 | 0 | N | 3540 | 3387 | 3767 | 11.2 | 380 | 0.40 |
| 112 | 0.2452 | 2694.21 | 726050.4682 | 4864918.1970 | 316.7 | 315 | NW | 3575 | 3500 | 3652 | 15.1 | 152 | 0.51 |
| 113 | 0.0852 | 1791.37 | 730230.7712 | 4864775.5960 | 31.2 | 45 | NE | 3540 | 3433 | 3665 | 21.2 | 232 | 0.46 |
| 114 | 0.0606 | 1096.40 | 728747.4821 | 4863321.2900 | 72.4 | 90 | E | 3721 | 3651 | 3806 | 22.8 | 155 | 0.45 |
| 115 | 0.0235 | 725.27 | 729173.9286 | 4863128.2360 | 39.7 | 45 | NE | 3528 | 3480 | 3574 | 23.3 | 94 | 0.51 |
| 116 | 0.3575 | 3630.19 | 729296.0223 | 4862701.6880 | 45 | 45 | NE | 3575 | 3434 | 3699 | 13.4 | 265 | 0.48 |
| 117 | 0.7416 | 9056.19 | 724485.7468 | 4862332.5120 | 11 | 0 | N | 3496 | 3296 | 3981 | 26.1 | 685 | 0.39 |
| 118 | 0.0737 | 1675.39 | 730055.3892 | 4862637.8910 | 346.6 | 0 | N | 3507 | 3381 | 3679 | 24.5 | 298 | 0.44 |
| 119 | 0.0844 | 1415.39 | 723870.3890 | 4862436.8960 | 45.4 | 45 | NE | 3608 | 3488 | 3878 | 33 | 390 | 0.33 |
| 120 | 0.1165 | 1903.09 | 728855.4294 | 4862020.7360 | 38.7 | 45 | NE | 3645 | 3551 | 3777 | 20.1 | 226 | 0.43 |
| 121 | 0.4176 | 4585.24 | 729563.7811 | 4861353.7550 | 47.6 | 45 | NE | 3492 | 3358 | 3680 | 19.8 | 322 | 0.43 |
| 122 | 0.2054 | 2257.23 | 724729.0226 | 4861020.6370 | 49.6 | 45 | NE | 3592 | 3499 | 3662 | 12.9 | 163 | 0.52 |
| 123 | 0.2103 | 2137.75 | 729625.3969 | 4860661.4000 | 71.2 | 90 | E | 3569 | 3431 | 3658 | 18.6 | 227 | 0.61 |
| 124 | 0.1401 | 1986.52 | 728712.8270 | 4860555.2420 | 343.5 | 0 | N | 3566 | 3482 | 3643 | 15.6 | 161 | 0.52 |
| 125 | 0.0315 | 1474.39 | 725163.3877 | 4860620.9840 | 37.2 | 45 | NE | 3475 | 3389 | 3586 | 31.6 | 197 | 0.46 |
| 126 | 0.0239 | 1118.82 | 729073.6443 | 4860265.5940 | 333.9 | 315 | NW | 3783 | 3674 | 3819 | 31.1 | 145 | 0.71 |
| 127 | 3.7179 | 19376.15 | 719721.8502 | 4865219.2850 | 296.9 | 315 | NW | 3660 | 3356 | 3964 | 11.8 | 608 | 0.45 |
| 128 | 0.0339 | 1157.40 | 715437.4495 | 4865606.0000 | 44 | 45 | NE | 3488 | 3439 | 3541 | 21.2 | 102 | 0.46 |
| 129 | 1.1355 | 10903.12 | 722463.9850 | 4864296.6310 | 240.4 | 225 | SW | 3616 | 3440 | 3890 | 12.2 | 450 | 0.39 |
| 130 | 0.3705 | 3031.55 | 718052.9063 | 4864056.2970 | 340.5 | 0 | N | 3533 | 3367 | 3790 | 20.2 | 423 | 0.44 |
| 131 | 0.0446 | 1088.11 | 719291.7742 | 4864069.9430 | 166.3 | 180 | S | 3605 | 3552 | 3643 | 14 | 91 | 0.60 |
| 132 | 0.0865 | 1320.83 | 715243.9300 | 4863336.4460 | 57.9 | 45 | NE | 3586 | 3515 | 3619 | 15.5 | 104 | 0.61 |
| 133 | 0.1987 | 1965.22 | 714881.1510 | 4862680.9640 | 43.6 | 45 | NE | 3551 | 3482 | 3719 | 16 | 237 | 0.36 |
| 134 | 0.8197 | 6257.29 | 721958.7739 | 4862010.8830 | 333.1 | 315 | NW | 3615 | 3384 | 3926 | 16.9 | 542 | 0.42 |
| 135 | 0.1495 | 2950.78 | 721178.1120 | 4862032.1280 | 337.8 | 0 | N | 3496 | 3337 | 3676 | 21.5 | 339 | 0.49 |
| 136 | 0.0538 | 1135.97 | 722545.1554 | 4862336.2320 | 238.9 | 225 | SW | 3887 | 3800 | 3989 | 26.9 | 189 | 0.47 |
| 137 | 0.0240 | 793.55 | 714663.0741 | 4861845.1970 | 31.8 | 45 | NE | 3580 | 3558 | 3610 | 16.7 | 52 | 0.48 |
| 138 | 0.0575 | 1318.82 | 720548.3000 | 4861589.3490 | 348.8 | 0 | N | 3424 | 3373 | 3469 | 13.1 | 96 | 0.53 |
| 139 | 0.3689 | 3343.36 | 721536.6395 | 4861331.1040 | 280.5 | 270 | WE | 3652 | 3510 | 3835 | 14.9 | 325 | 0.46 |
| 140 | 0.3395 | 3081.08 | 712061.7074 | 4870053.1140 | 194.4 | 180 | S | 3764 | 3648 | 3854 | 13.7 | 206 | 0.52 |
| 141 | 0.0276 | 705.27 | 712312.9628 | 4870470.2860 | 137.7 | 135 | SE | 3873 | 3784 | 3926 | 29 | 142 | 0.59 |
| 142 | 0.2305 | 2841.08 | 714075.6907 | 4867652.7940 | 285.2 | 270 | WE | 3565 | 3515 | 3682 | 13.5 | 167 | 0.34 |
| 143 | 0.3320 | 5932.27 | 714215.4986 | 4866743.2160 | 313.8 | 315 | NW | 3493 | 3384 | 3728 | 19 | 344 | 0.36 |
| 144 | 0.0818 | 1867.28 | 714796.5854 | 4865806.3120 | 266.8 | 270 | WE | 3520 | 3468 | 3717 | 15.1 | 249 | 0.27 |
| 145 | 0.7614 | 5422.15 | 710755.9607 | 4865561.9490 | 47.1 | 45 | NE | 3570 | 3315 | 3701 | 15.9 | 386 | 0.64 |
| 146 | 0.7784 | 7256.35 | 708540.8574 | 4865087.9820 | 101.7 | 90 | E | 3539 | 3459 | 3705 | 11.4 | 246 | 0.36 |
| 147 | 0.0468 | 1213.97 | 709835.1958 | 4865452.5370 | 165.8 | 180 | S | 3565 | 3525 | 3602 | 14 | 77 | 0.51 |
| 148 | 0.0225 | 997.40 | 711545.1633 | 4865328.8640 | 34.9 | 45 | NE | 3316 | 3265 | 3400 | 30.3 | 135 | 0.43 |
| 149 | 0.4941 | 4523.16 | 714739.2841 | 4864004.1130 | 353.7 | 0 | N | 3535 | 3329 | 3676 | 14.6 | 347 | 0.57 |
| 150 | 0.1062 | 1627.33 | 707793.2680 | 4864513.8100 | 76.9 | 90 | E | 3659 | 3583 | 3778 | 21.1 | 195 | 0.44 |
| 151 | 0.1148 | 1996.14 | 715149.0451 | 4864269.6550 | 327.6 | 315 | NW | 3548 | 3419 | 3707 | 20.6 | 288 | 0.45 |
| 152 | 0.2969 | 3690.54 | 714099.0304 | 4862452.7280 | 17.4 | 0 | N | 3511 | 3425 | 3671 | 13.4 | 246 | 0.35 |
| 153 | 0.1062 | 1660.87 | 713354.8340 | 4862288.3340 | 343.4 | 0 | N | 3474 | 3393 | 3611 | 20.8 | 218 | 0.37 |
| 154 | 1.4386 | 9675.70 | 721647.3217 | 4864933.5300 | 182 | 180 | S | 3686 | 3422 | 3910 | 10.4 | 488 | 0.47 |
| 155 | 4.4019 | 17752.87 | 710557.2895 | 4869448.8690 | 124.3 | 135 | SE | 3668 | 3303 | 3953 | 9.7 | 650 | 0.52 |
| 156 | 14.3220 | 34326.67 | 722370.6891 | 4867856.1370 | 121.3 | 135 | SE | 3816 | 3122 | 4243 | 10 | 1121 | 0.59 |
| 157 | 0.4723 | 10704.61 | 716524.9582 | 4880021.8030 | 62.4 | 45 | NE | 4149 | 3749 | 4583 | 40.2 | 834 | 0.51 |
| 158 | 3.0996 | 14331.43 | 714326.2204 | 4878262.4670 | 334.1 | 315 | NW | 4077 | 2345 | 4468 | 27.7 | 2123 | 0.77 |
| 159 | 15.4779 | 58177.93 | 718243.2840 | 4873538.1360 | 45.3 | 45 | NE | 3849 | 3152 | 4667 | 13 | 1515 | 0.46 |
| 160 | 0.2907 | 3094.76 | 707831.3647 | 4885829.5510 | 28.4 | 45 | NE | 3925 | 3707 | 4231 | 25.1 | 524 | 0.47 |
| 161 | 0.3037 | 3276.69 | 707296.8347 | 4883679.0160 | 284.5 | 270 | WE | 4136 | 3772 | 4418 | 33.9 | 646 | 0.53 |
| 162 | 0.1902 | 2675.33 | 708003.0205 | 4882876.0270 | 150.9 | 135 | SE | 4250 | 3974 | 4387 | 34.2 | 413 | 0.63 |
| 163 | 0.4027 | 5245.44 | 705923.5037 | 4880286.6440 | 3.4 | 0 | N | 3674 | 3460 | 3967 | 22.6 | 507 | 0.41 |
| 164 | 0.1153 | 1673.74 | 705688.1398 | 4879631.4410 | 297.2 | 315 | NW | 3980 | 3804 | 4073 | 27.1 | 269 | 0.61 |
| 165 | 1.0011 | 6205.75 | 704862.2886 | 4876652.3890 | 350.9 | 0 | N | 3559 | 3360 | 3827 | 15.5 | 467 | 0.45 |
| 166 | 2.2170 | 14737.92 | 706588.6902 | 4873882.1450 | 218.8 | 225 | SW | 3604 | 3227 | 3956 | 11.5 | 729 | 0.52 |
| 167 | 1.4381 | 12502.45 | 707619.3151 | 4875649.2370 | 40.4 | 45 | NE | 3543 | 3320 | 3891 | 17.1 | 571 | 0.41 |
| 168 | 6.3050 | 25251.01 | 709519.9254 | 4873123.1310 | 16.9 | 0 | N | 3678 | 3340 | 4029 | 13.2 | 689 | 0.48 |
| 169 | 6.9428 | 32693.34 | 713158.7035 | 4873176.4870 | 348 | 0 | N | 3737 | 3349 | 4385 | 16.8 | 1036 | 0.38 |
| 170 | 0.7566 | 7256.23 | 714532.1844 | 4874750.1290 | 306.6 | 315 | NW | 3995 | 3493 | 4384 | 27.7 | 891 | 0.56 |
| 171 | 2.2217 | 11563.12 | 714802.6754 | 4876616.3650 | 272.5 | 270 | WE | 4108 | 3648 | 4656 | 21.6 | 1008 | 0.45 |
| 172 | 0.3297 | 3078.77 | 712566.3470 | 4878193.8040 | 324.2 | 315 | NW | 4015 | 3646 | 4319 | 40.4 | 673 | 0.53 |
| 173 | 0.1178 | 2570.21 | 713783.0911 | 4877502.5780 | 126.7 | 135 | SE | 4346 | 4112 | 4467 | 35.1 | 355 | 0.62 |
| 174 | 0.2606 | 3012.78 | 714789.1776 | 4875814.5000 | 292 | 270 | WE | 4214 | 3851 | 4557 | 37.5 | 706 | 0.51 |
| 175 | 0.2023 | 2836.39 | 714715.1879 | 4875495.6440 | 276.3 | 270 | WE | 4217 | 3980 | 4594 | 32.6 | 614 | 0.45 |
| 176 | 0.1603 | 2382.81 | 714142.4584 | 4875572.6910 | 299.4 | 315 | NW | 3833 | 3717 | 4111 | 31.5 | 394 | 0.35 |
| 177 | 3.6120 | 18211.36 | 710666.1112 | 4866948.8230 | 67.5 | 45 | NE | 3517 | 3205 | 3806 | 12.4 | 601 | 0.51 |
| 178 | 3.2623 | 14345.77 | 713994.1059 | 4870112.9900 | 204.2 | 225 | SW | 3761 | 3387 | 4184 | 11.7 | 797 | 0.50 |
| 179 | 1.8472 | 10938.03 | 711463.1684 | 4870412.9930 | 187.7 | 180 | S | 3716 | 3446 | 4157 | 11.2 | 711 | 0.40 |
| 180 | 0.0924 | 2043.31 | 714511.3249 | 4868444.7540 | 42.8 | 45 | NE | 3727 | 3684 | 3825 | 21 | 141 | 0.41 |
| 181 | 2.4157 | 13208.41 | 712929.1500 | 4870163.1780 | 182.7 | 180 | S | 3650 | 3433 | 3910 | 9.9 | 477 | 0.47 |
| 182 | 1.6830 | 10331.70 | 723200.3879 | 4863353.1790 | 60.2 | 45 | NE | 3651 | 3366 | 3890 | 14.1 | 524 | 0.54 |
| 183 | 1.1652 | 7451.29 | 723331.1389 | 4861596.3570 | 108.2 | 90 | E | 3716 | 3445 | 3940 | 14.1 | 495 | 0.52 |
| 184 | 2.3292 | 11723.48 | 724696.2060 | 4868514.4100 | 162.1 | 180 | S | 3803 | 3517 | 4086 | 12.2 | 569 | 0.49 |
| 185 | 5.4647 | 27101.44 | 728304.2023 | 4868053.3890 | 130 | 135 | SE | 3768 | 3361 | 4290 | 11.6 | 929 | 0.43 |
| 186 | 0.2341 | 2731.62 | 723896.7866 | 4868599.4600 | 178.8 | 180 | S | 4020 | 3868 | 4105 | 17.5 | 237 | 0.62 |
| 187 | 0.1359 | 1779.65 | 727060.6986 | 4868061.7050 | 149.6 | 135 | SE | 4107 | 3962 | 4200 | 27.3 | 238 | 0.61 |
| 188 | 0.1106 | 1633.25 | 727067.2690 | 4866938.1530 | 256.8 | 270 | WE | 3940 | 3860 | 4028 | 22 | 168 | 0.48 |
| 189 | 0.3392 | 2723.00 | 721812.8553 | 4879753.9660 | 345.5 | 0 | N | 4071 | 3711 | 4359 | 33.1 | 648 | 0.55 |
| 190 | 0.1775 | 2325.64 | 721927.8071 | 4878941.8290 | 278 | 270 | WE | 4387 | 4085 | 4576 | 35.1 | 491 | 0.61 |
| 191 | 0.1608 | 2001.41 | 721791.7681 | 4879257.3600 | 298.9 | 315 | NW | 4268 | 4026 | 4506 | 32.3 | 480 | 0.51 |
| 192 | 0.0381 | 1498.07 | 722299.9563 | 4878828.7910 | 137.1 | 135 | SE | 4490 | 4335 | 4573 | 33.6 | 238 | 0.64 |
| 193 | 1.1662 | 6679.20 | 722809.7119 | 4877921.0470 | 58.1 | 45 | NE | 4015 | 3735 | 4503 | 23.9 | 768 | 0.39 |
| 194 | 0.9259 | 6863.25 | 728232.6722 | 4870719.7570 | 351.3 | 0 | N | 3844 | 3566 | 4287 | 23.4 | 721 | 0.42 |
| 195 | 0.7490 | 9044.81 | 724863.6280 | 4876597.9210 | 357.5 | 0 | N | 3973 | 3661 | 4450 | 40.4 | 789 | 0.41 |
| 196 | 2.7756 | 13878.22 | 722565.2539 | 4876034.3910 | 106.9 | 90 | E | 4055 | 3682 | 4406 | 13.9 | 724 | 0.47 |
| 197 | 0.0984 | 1706.96 | 716454.1003 | 4874549.1650 | 225.3 | 225 | SW | 4313 | 4209 | 4380 | 30.1 | 171 | 0.57 |
| 198 | 9.1357 | 34859.97 | 725662.0967 | 4870656.8110 | 36.2 | 45 | NE | 3788 | 3451 | 4215 | 12 | 764 | 0.45 |
| 199 | 1.6199 | 12271.74 | 724879.8677 | 4872805.2640 | 350.9 | 0 | N | 3819 | 3622 | 4285 | 18.3 | 663 | 0.34 |
| 200 | 0.2168 | 2157.05 | 724454.6926 | 4872155.8140 | 130.4 | 135 | SE | 4130 | 3980 | 4294 | 24.3 | 314 | 0.52 |
| 201 | 0.1296 | 1984.94 | 725813.5648 | 4873602.5830 | 323.8 | 315 | NW | 4013 | 3675 | 4156 | 31.4 | 481 | 0.63 |
| 202 | 0.1029 | 1761.27 | 708049.8955 | 4883240.3130 | 64.1 | 45 | NE | 4277 | 3992 | 4458 | 47.1 | 466 | 0.56 |
| 203 | 0.0337 | 1100.49 | 708869.5141 | 4878006.3730 | 57 | 45 | NE | 3767 | 3599 | 3904 | 49.2 | 305 | 0.55 |
| 204 | 0.0234 | 598.86 | 708433.6933 | 4878268.0520 | 62.8 | 45 | NE | 3887 | 3813 | 3923 | 34.3 | 110 | 0.61 |
| 205 | 0.2053 | 2946.96 | 708683.1788 | 4870151.8460 | 318.8 | 315 | NW | 3655 | 3519 | 3904 | 23.6 | 385 | 0.38 |
| 206 | 4.9561 | 24946.49 | 704543.0019 | 4874675.5850 | 191.6 | 180 | S | 3552 | 3247 | 3892 | 10.5 | 645 | 0.45 |
| 207 | 0.1896 | 2127.15 | 709425.9546 | 4865752.1120 | 205.1 | 225 | SW | 3669 | 3589 | 3805 | 16.9 | 216 | 0.41 |
| 208 | 7.9326 | 31759.75 | 719243.1291 | 4868013.1170 | 223.5 | 225 | SW | 3768 | 3310 | 4238 | 10.9 | 928 | 0.50 |
| 209 | 0.1514 | 2213.80 | 731761.9918 | 4871561.7190 | 310.9 | 315 | NW | 3887 | 3712 | 4019 | 30.8 | 307 | 0.55 |
| 210 | 0.8083 | 8235.82 | 716490.5580 | 4878282.0950 | 34.3 | 45 | NE | 3959 | 3538 | 4372 | 32.2 | 834 | 0.48 |
| 211 | 0.0292 | 743.29 | 729901.3510 | 4864948.4560 | 13.4 | 0 | N | 3629 | 3517 | 3705 | 36.3 | 188 | 0.53 |
| 212 | 0.0264 | 1037.97 | 731238.5014 | 4863312.4080 | 54.7 | 45 | NE | 3378 | 3338 | 3432 | 21.2 | 94 | 0.44 |
| 213 | 0.1275 | 1657.81 | 730114.8440 | 4873734.7620 | 349.9 | 0 | N | 3831 | 3574 | 3954 | 33.8 | 380 | 0.64 |
| 214 | 0.0227 | 569.04 | 732173.1300 | 4871576.9120 | 70.8 | 90 | E | 3913 | 3852 | 3932 | 28.4 | 80 | 0.68 |
| 215 | 0.0225 | 880.93 | 730486.9110 | 4872153.6860 | 21.5 | 0 | N | 3582 | 3569 | 3590 | 5 | 21 | 0.56 |
| 216 | 2.5860 | 11323.39 | 717519.7066 | 4876259.8090 | 48.6 | 45 | NE | 3676 | 3394 | 4499 | 21.6 | 1105 | 0.32 |
| 217 | 0.0293 | 912.56 | 728292.0081 | 4877849.3230 | 285.1 | 270 | WE | 4245 | 4186 | 4306 | 34.2 | 120 | 0.51 |
| 218 | 0.2620 | 3705.42 | 716226.1762 | 4875879.5260 | 40.3 | 45 | NE | 4527 | 4172 | 4680 | 46.4 | 508 | 0.64 |
| 219 | 0.0674 | 1399.23 | 705668.7305 | 4877883.4780 | 308.4 | 315 | NW | 3881 | 3718 | 4031 | 38.1 | 313 | 0.50 |
| 220 | 0.7032 | 4944.41 | 706973.5768 | 4876519.2770 | 42 | 45 | NE | 3646 | 3417 | 3936 | 18.1 | 519 | 0.44 |
| 221 | 0.0453 | 1672.95 | 726359.2971 | 4877536.6820 | 355.4 | 0 | N | 3904 | 3574 | 4094 | 46.1 | 520 | 0.60 |
| 222 | 0.0302 | 760.87 | 723570.4265 | 4864621.9720 | 101.7 | 90 | E | 3605 | 3555 | 3657 | 22.1 | 102 | 0.53 |
| 223 | 0.4695 | 10704.61 | 716524.9582 | 4880021.8030 | 37.8 | 45 | NE | 4151 | 3852 | 4474 | 35.4 | 622 | 0.48 |
| 224 | 0.1067 | 10704.61 | 716524.9582 | 4880021.8030 | 194.2 | 180 | S | 4453 | 4112 | 4586 | 34.7 | 474 | 0.67 |
